# Supplementary material
Source: PubMed Central journal article supplement (PMC2674759)
Supplement: NIHMS108639-supplement-1_si_001.pdf [file NIHMS108639-supplement-1_si_001.pdf]

# Geometry Directed Self-Selection in the Coordination-Driven Self-Assembly of Irregular Supramolecular Polygons

*Yao-Rong Zheng,<sup>†</sup> Brian H, Northrop,<sup>†</sup> Hai-Bo Yang,<sup>‡</sup> Liang Zhao,<sup>†</sup> and Peter J. Stang<sup>\*†</sup>*

*<sup>†</sup>Department of Chemistry, University of Utah, 315 South 1400 East, RM, 2020, Salt  
Lake City, Utah, 84112.*

*<sup>‡</sup>Shanghai Key Laboratory of Green Chemistry and Chemical Processes, Department  
of Chemistry, East China Normal University, Shanghai, China 200062*

To whom correspondence should be addressed. E-mail: stang@chem.utah.edu.

## **Table of Contents**

|                                                                                                                         |    |
|-------------------------------------------------------------------------------------------------------------------------|----|
| Experimental details for synthesis and characterization of dipyriddy ligand <b>1a,b,c</b> .....                         | S2 |
| <sup>31</sup> P{ <sup>1</sup> H} and Partial <sup>1</sup> H spectra for self-selection of <b>4b</b> and <b>6b</b> ..... | S5 |
| ESI-MS spectra for self-selection of <b>4b</b> , <b>6a</b> , and <b>6b</b> .....                                        | S6 |
| Table of X-ray crystallography data of <b>5</b> .....                                                                   | S7 |

**General Procedure for Sonogashira Coupling Reaction.** A 50 mL Schlenk flask was charged with appropriate aryl halide, Ethynylpyridine, Pd(PPh<sub>3</sub>)<sub>4</sub>, and CuI, degassed, and back-filled three times with N<sub>2</sub>(g). Dry THF (15 mL) and triethylamine (10 mL) were then introduced into the reaction via syringe. The reaction was allowed to stir at 60 °C for 16 h under N<sub>2</sub>. The reaction mixture was partitioned between water (75 mL) and CH<sub>2</sub>Cl<sub>2</sub> (50 mL). The organic layer was separated and extracted further with CH<sub>2</sub>Cl<sub>2</sub> (3 × 30 mL). The combined organic layers were dried (MgSO<sub>4</sub>), filtered, and evaporated. The resulting brown residues were purified by column chromatography on silica gel.

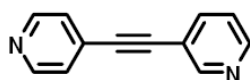

**Unsymmetrical ligand 1a.** Reaction scale: 4-Bromopyridine hydrochloride (368 mg, 1.89 mmol), 3-Ethynylpyridine (150 mg, 1.45 mmol), Pd(PPh<sub>3</sub>)<sub>4</sub> (60 mg, 0.052 mmol), and CuI (10 mg, 0.052 mmol). Chromatography eluent: Acetone/CH<sub>2</sub>Cl<sub>2</sub> (1:1). Yield: 150 mg (off white solid), 57.2 %. Mp 62–63 °C; <sup>1</sup>H NMR (CDCl<sub>3</sub>, 300MHz) δ 8.80 (d, 1H, *J*=1.2 Hz, H<sub>2</sub>-3-Pyr), 8.64 (d, 2H, *J*=6.0 Hz, H<sub>α</sub>-4-Pyr), 8.61 (dd, 1H, *J*=5.1, 1.5 Hz, H<sub>6</sub>-3-Pyr), 7.83 (td, 1H, *J*=1.8, 8.1 Hz, H<sub>4</sub>-3-Pyr), 7.40 (d, 2H, *J*=6.0 Hz, H<sub>β</sub>-4-Pyr), 7.32 (dd, 1H, *J*=7.5, 5.1 Hz, H<sub>5</sub>-3-Pyr). <sup>13</sup>C NMR (CDCl<sub>3</sub>, 300MHz) δ 153.08, 150.56, 150.10, 150.60, 139.36, 131.26, 126.14, 123.78, 119.96, 90.92, 90.35 ppm. HRMS (ESI-TOF): *m/z* 181.0761 ([M+H]<sup>+</sup>; calcd for C<sub>12</sub>H<sub>9</sub>N<sub>2</sub>: 181.0766) Anal. Calcd for C<sub>12</sub>H<sub>8</sub>N<sub>2</sub>: C, 79.98; H, 4.47; N, 15.55. Found: C, 79.71; H, 4.43; N, 15.28.

**Figure S1.**  $^{13}\text{C}$  (top) and Partial  $^1\text{H}$  (bottom) NMR spectra ( $\text{CDCl}_3$ , 300 MHz) recorded for **1a**

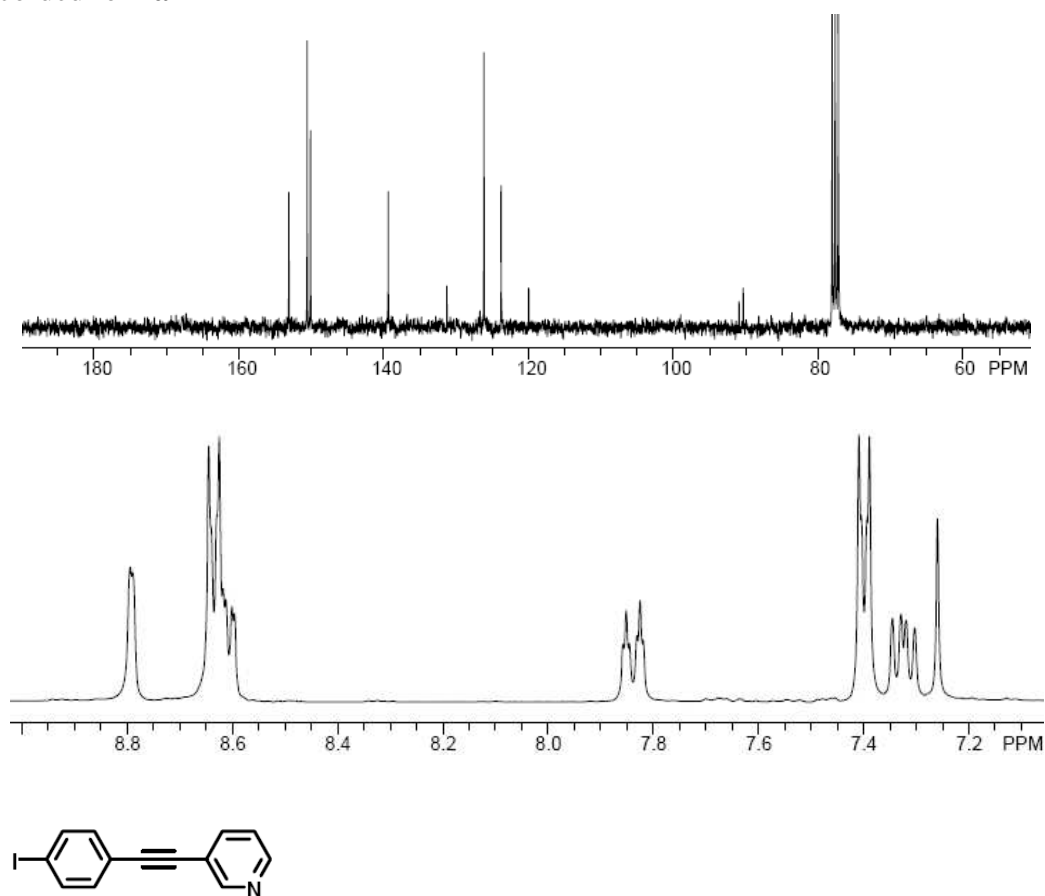

**3-((4-iodophenyl)ethynyl)pyridine (1c).** Reaction scale: 1,4-Diiodobenzene (1.44 g, 4.36 mmol), 3-Ethynylpyridine (150 mg, 1.45 mmol),  $\text{Pd}(\text{PPh}_3)_4$  (60 mg, 0.052 mmol), and  $\text{CuI}$  (10 mg, 0.052 mmol). Chromatography eluent:  $\text{CH}_2\text{Cl}_2$ . Yield 150 mg (off white solid), 33.9 %. Mp 144–145 °C;  $^1\text{H}$  NMR ( $\text{CDCl}_3$ , 300MHz)  $\delta$  8.76 (d, 1H,  $J=1.2$  Hz,  $\text{H}_2$ -3-Pyr), 8.51 (dd, 2H,  $J=4.8, 1.5$  Hz,  $\text{H}_3$ -3-Pyr), 7.78 (td, 1H,  $J=7.8, 1.8$  Hz,  $\text{H}_4$ -3-Pyr), 7.70 (d,  $J=8.4$  Hz,  $\text{H}_\beta$ -Phenylene), 7.25 (m, 3H,  $\text{H}_\alpha$ -Phenylene,  $\text{H}_5$ -3-Pyr).  $^{13}\text{C}$  NMR ( $\text{CDCl}_3$ , 300MHz)  $\delta$  152.86, 149.44, 139.03, 138.27, 133.74, 123.70, 122.63, 120.75, 95.50, 92.29, 87.94 ppm. HRMS (ESI-TOF):  $m/z$  305.9789 ( $[\text{M}+\text{H}]^+$ ; calcd for  $\text{C}_{13}\text{H}_9\text{NI}$ : 305.9780) Anal. Calcd for  $\text{C}_{13}\text{H}_8\text{NI}$ : C, 51.17; H, 2.64; N, 4.59. Found: C, 51.74; H, 2.66; N, 4.30.

**Figure S2.**  $^{13}\text{C}$  (top) and Partial  $^1\text{H}$  (bottom) NMR spectra ( $\text{CDCl}_3$ , 300 MHz) recorded for **3-((4-iodophenyl)ethynyl)pyridine (1c)**

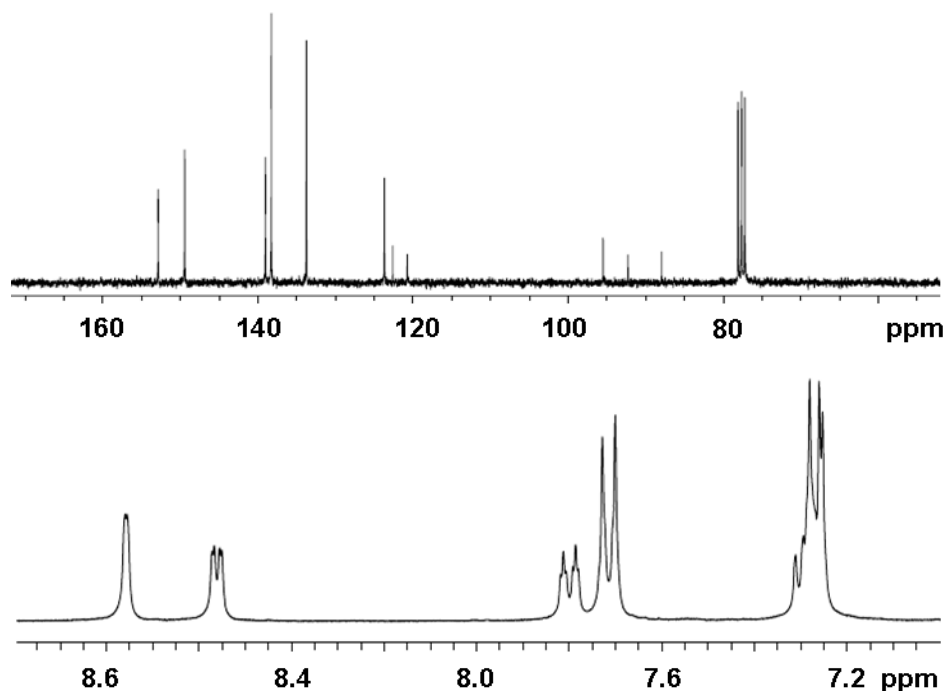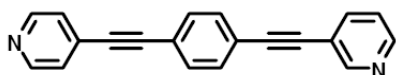

**Unsymmetrical ligand 1b.** Reaction scale: **1c** (130 mg, 0.426 mmol), 4-Ethynylpyridine hydrochloride (71 mg, 0.509 mmol),  $\text{Pd}(\text{PPh}_3)_4$  (40 mg, 0.035 mmol), and  $\text{CuI}$  (7 mg, 0.035 mmol). Chromatography eluent: Acetone/ $\text{CH}_2\text{Cl}_2$  (1:1). Yield 50.0 mg (pale yellow solid), 41.9 %. Mp 183–184 °C;  $^1\text{H}$  NMR ( $\text{CDCl}_3$ , 300MHz)  $\delta$  8.78 (d, 1H,  $J=1.2$  Hz,  $\text{H}_2$ -3-Pyr), 8.61 (d, 2H,  $J=6.0$  Hz,  $\text{H}_\alpha$ -4-Pyr), 8.56 (dd, 1H,  $J=4.8, 1.5$  Hz,  $\text{H}_6$ -3-Pyr), (td, 1H,  $J=2.1, 7.8$  Hz,  $\text{H}_4$ -3-Pyr), 7.55 (s, 4H,  $\text{H}_{\text{phenylene}}$ ), 7.38 (d, 2H,  $J=6.3$  Hz,  $\text{H}_\beta$ -4-Pyr), 7.26 (dd, 1H,  $J=7.8, 5.1$  Hz,  $\text{H}_5$ -3-Pyr).  $^{13}\text{C}$  NMR ( $\text{CDCl}_3$ , 300MHz)  $\delta$  152.94, 150.51, 149.94, 139.11, 132.53, 132.37, 131.71, 126.13, 123.98, 123.74, 123.04, 120.71, 93.93, 92.64, 89.24, 88.90. HRMS (ESI-TOF):  $m/z$  281.1078 ( $[\text{M}+\text{H}]^+$ ; calcd for  $\text{C}_{20}\text{H}_{13}\text{N}_2$ : 281.1079) Anal. Calcd for  $\text{C}_{20}\text{H}_{12}\text{N}_2$ : C, 85.69; H, 4.31; N, 9.99. Found: C, 84.31; H, 4.31; N, 9.56.

**Figure S3.**  $^{13}\text{C}$  (a) and Partial  $^1\text{H}$  (b) NMR spectra ( $\text{CDCl}_3$ , 300 MHz) recorded for **1b**

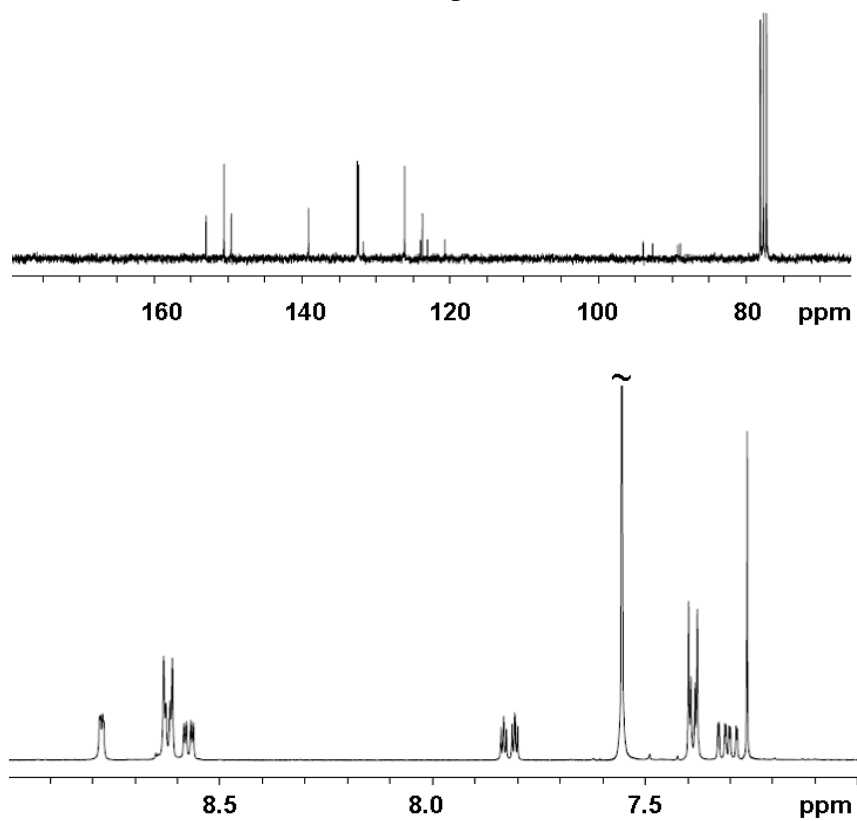

**Figure S4.**  $^{31}\text{P}\{^1\text{H}\}$  (a) and  $^1\text{H}$  NMR (b) spectra recorded for self-selection of **4b**.

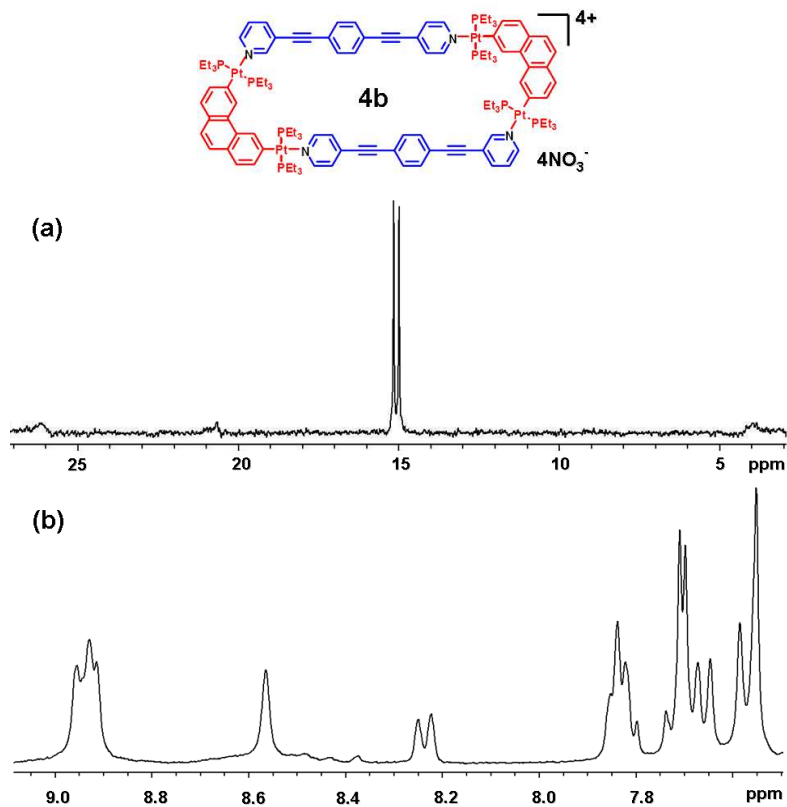

Figure S5.  $^{31}\text{P}\{^1\text{H}\}$  and  $^1\text{H}$  NMR spectra recorded for self-selection of **6b**.

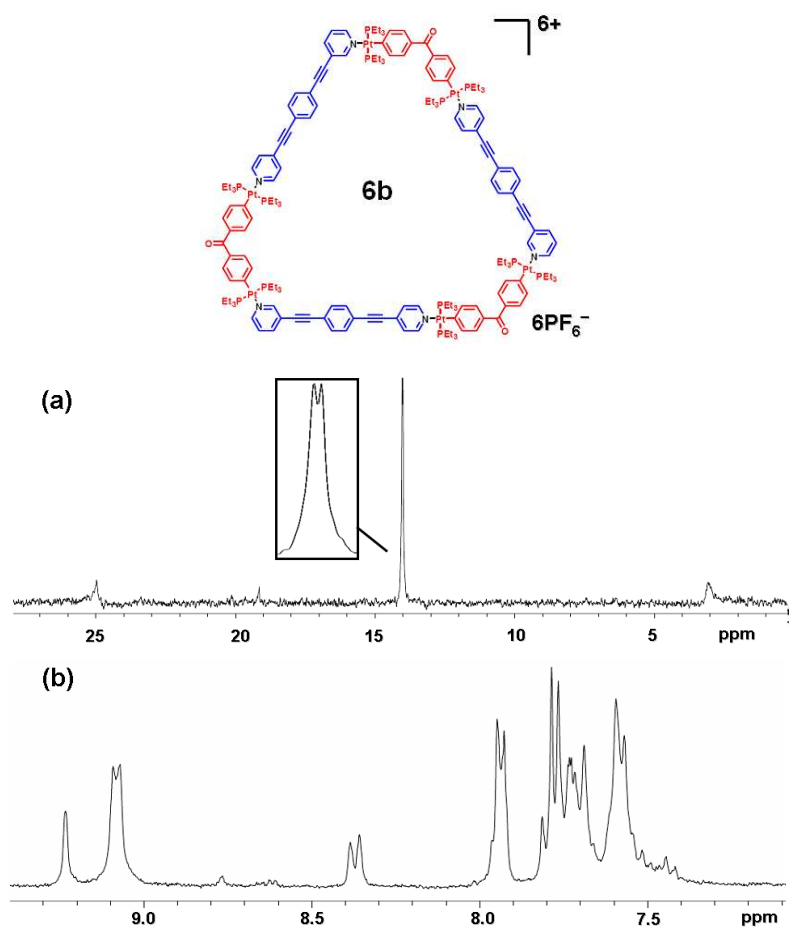

Figure S6. ESI-MS spectra recorded for self-selection of **4b**, **6a**, and **6b**.

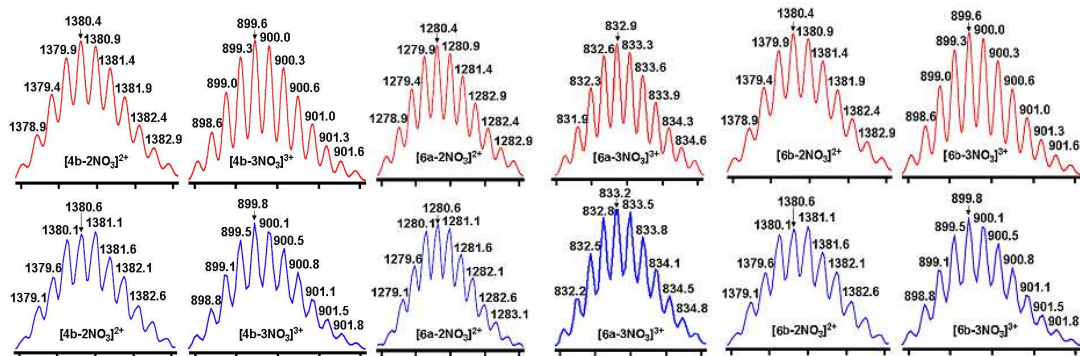

**Table S1.** X-ray crystallography data of **4a**.

| Compound               | <b>4a</b>                    |
|------------------------|------------------------------|
| formula                | C110 H172 Cl20 N8 O12 P8 Pt4 |
| FW                     | 3535.75                      |
| crystal system         | triclinic                    |
| space group            | $P\bar{1}$                   |
| $a/\text{\AA}$         | 10.74550(10)                 |
| $b/\text{\AA}$         | 18.3338(2)                   |
| $c/\text{\AA}$         | 19.2355(2)                   |
| $\alpha/\text{deg}$    | 78.1129(7)                   |
| $\beta/\text{deg}$     | 86.5602(7)                   |
| $\gamma/\text{deg}$    | 79.1068(6)                   |
| $V/\text{\AA}^3$       | 3640.55(6)                   |
| Z                      | 1                            |
| $D_c/\text{g cm}^{-3}$ | 1.613                        |
| $\mu/\text{mm}^{-1}$   | 4.339                        |
| $R_1^a (I > 2\sigma)$  | 0.0481                       |
| $wR_2^b$ (all data)    | 0.1268                       |
| GOF                    | 1.033                        |
